# Supplementary material for: Nephronectin regulates atrioventricular canal differentiation via Bmp4-Has2 signaling in zebrafish
Source: PubMed Central journal article supplement — Development. 2011 Oct 15;138(20):4499–509. doi: 10.1242/dev.067454 (PMC3253110; doi:10.1242/dev.067454), 2011-10-15
Supplement: supp_138.20.4499_DEV067454FigS4.pdf [file supp_138.20.4499_DEV067454FigS4.pdf]

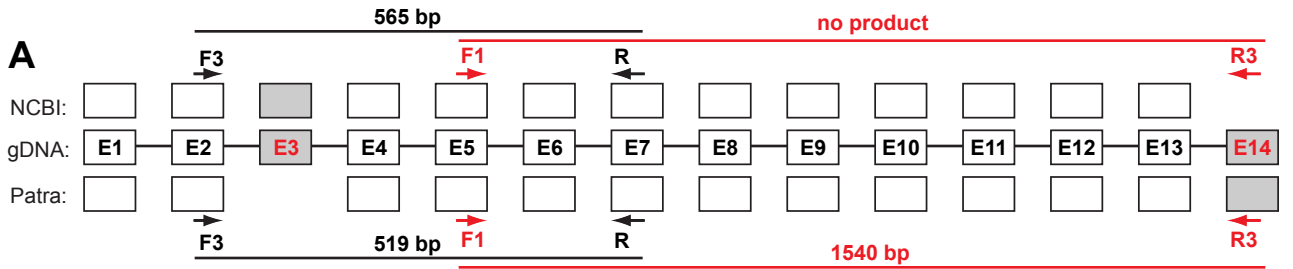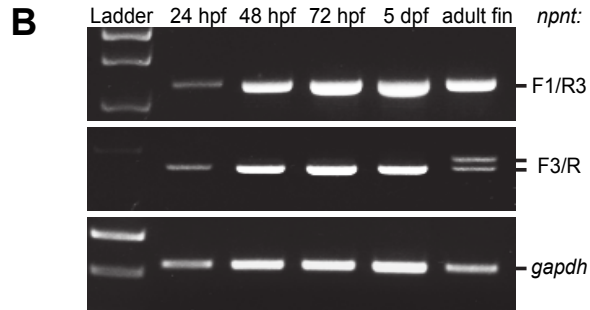

**C**

|       |     |                                                                          |     |
|-------|-----|--------------------------------------------------------------------------|-----|
| NCBI  | 1   | MWIIKFLMWTCWIAVDADFDGRWSRQSSSNGLCRYGGRIDCCGWTRVSWGQCQPLYVLTTRRIGIRC      | 70  |
| Patra | 1   | MWIIKFLMWTCWIAVDADFDGRWSRQSSSNGLCRYGGRIDCCGWTRVSWGQCQPL                  | 68  |
| NCBI  | 71  | QPQALCQHGHGCKHGEVCGPNKCKCHPGYTGKTCNQDLNECGLKPRPCKHRCMNTFGSFKCYCLNGFMLLPD | 140 |
| Patra | 99  | ----CQHGHGCKHGEVCGPNKCKCHPGYTGKTCNQDLNECGLKPRPCKHRCMNTFGSFKCYCLNGFMLLPD  | 123 |
| NCBI  | 141 | GSCANARTCSMANCQYGCEVMKGEVRCQCPSPGLQLAPDGRTCVDVDECAAGLAVCPFRFRKCINTFGSYI  | 210 |
| Patra | 124 | GSCANARTCSMANCQYGCEVMKGEVRCQCPSPGLQLAPDGRTCVDVDECAAGLAVCPFRFRKCINTFGSYI  | 193 |
| NCBI  | 211 | CKCHDGFDLQYVNGKYQCTDVNECSLGQHQCQGYATCYNTPGSYKCKCKEDYRGVGYDCKPIPKVVIDPP   | 280 |
| Patra | 194 | CKCHDGFDLQYVNGKYQCTDVNECSLGQHQCQGYATCYNTPGSYKCKCKEDYRGVGYDCKPIPKVVIDPP   | 263 |
| NCBI  | 281 | RPGKTPSSNNKGGNKIPGSDQKRTTTTTRVPVTAKRISPTITTTTTTKPPPTKKITPPARVPVTTTR      | 350 |
| Patra | 264 | RPGKTPSSNNKGGNKIPGSDQKRTTTTTRVPVTAKRISPTITTTTTTKPPPTKKITPPARVPVTTTR      | 333 |
| NCBI  | 351 | KPFIPTRKPPVLVTTKPKVPTHQHTTTKVPVTVAVVPFIPTRRPFTIPFVTPIDNSIKDITQKQRGVDVHI  | 420 |
| Patra | 334 | KPFIPTRKPPVLVTTKPKVPTHQHTTTKVPVTVAVVPFIPTRRPFTIPFVTPIDNSIKDITQKQRGVDVHI  | 403 |
| NCBI  | 421 | PRNHGKNNVLGIDLDIELGNTEEELKDDPESGYLSCSFDHGLCGWIQRREGDLHWETSEDPSGGRYLTIS   | 490 |
| Patra | 404 | PRNHGKNNVLGIDLDIELGNTEEELKDDPESGYLSCSFDHGLCGWIQRREGDLHWETSEDPSGGRYLTIS   | 473 |
| NCBI  | 491 | EGGEKRGGRGAQLILPLKTPWNEGNLCLAFRHNMAGHHVGMLOVVFQKGRQHSPAVWGRTGGNGWRSTQI   | 560 |
| Patra | 474 | EGGEKRGGRGAQLILPLKTPWNEGNLCLAFRHNMAGHHVGMLOVVFQKGRQHSPAVWGRTGGNGWRSTQI   | 543 |
| NCBI  | 561 | TLWNGLESVIVKGERRRGRKGEIALDDMSLKRGSQEEHNLRL 605                           |     |
| Patra | 544 | TLWNGLESVIVKGERRRGRKGEIALDDMSLKR++L                                      |     |

**D**

**Motif Scan results:**

List of matches

ASX\_HYDROXYL: 120-131, 202-213, 247-258  
 CYS\_RICH: 70-258  
 EGF\_1: 91-102  
 EGF\_2: 91-102, 129-143  
 EGF\_CA: 105-129, 185-211, 230-256  
 EGF\_3: 66-103, 105-144, 185-223, 230-270  
 MAM\_2: 454-598  
 PRO\_RICH: 332-402  
 THR-RICH: 306-377

Frequent patterns:

AMIDATION: 578-581  
 C\_tripleX: 71- 87  
 CAMP\_PHOSPHO\_SITE: 304-307, 317-320, 336-339, 592-595  
 CK2\_PHOSPHO\_SITE: 182-185, 401-404, 406-409, 441-444, 477-480, 488-491, 595-598  
 EGF\_alliinase: 90-109  
 MYRISTYL: 79- 84, 125-130, 141-146, 207-212, 237-242, 252-257, 497-502  
 PKC\_PHOSPHO\_SITE: 62- 64, 98-100, 126-128, 253-255, 309-311, 315-317, 329-331, 335-337, 348-350, 356-358, 364-366, 376-378, 391-393, 406-408, 411-413, 590-592  
 RGD: 415-417  
 Transglut\_C: 519-538  
 TIL: 166-189  
 TYR\_PHOSPHO\_SITE: 446-453
