# Supplementary figures and images for: Nephronectin regulates atrioventricular canal differentiation via Bmp4-Has2 signaling in zebrafish
Source: PubMed Central journal article supplement — Development. 2011 Oct 15;138(20):4499–509. doi: 10.1242/dev.067454 (PMC3253110; doi:10.1242/dev.067454), 2011-10-15

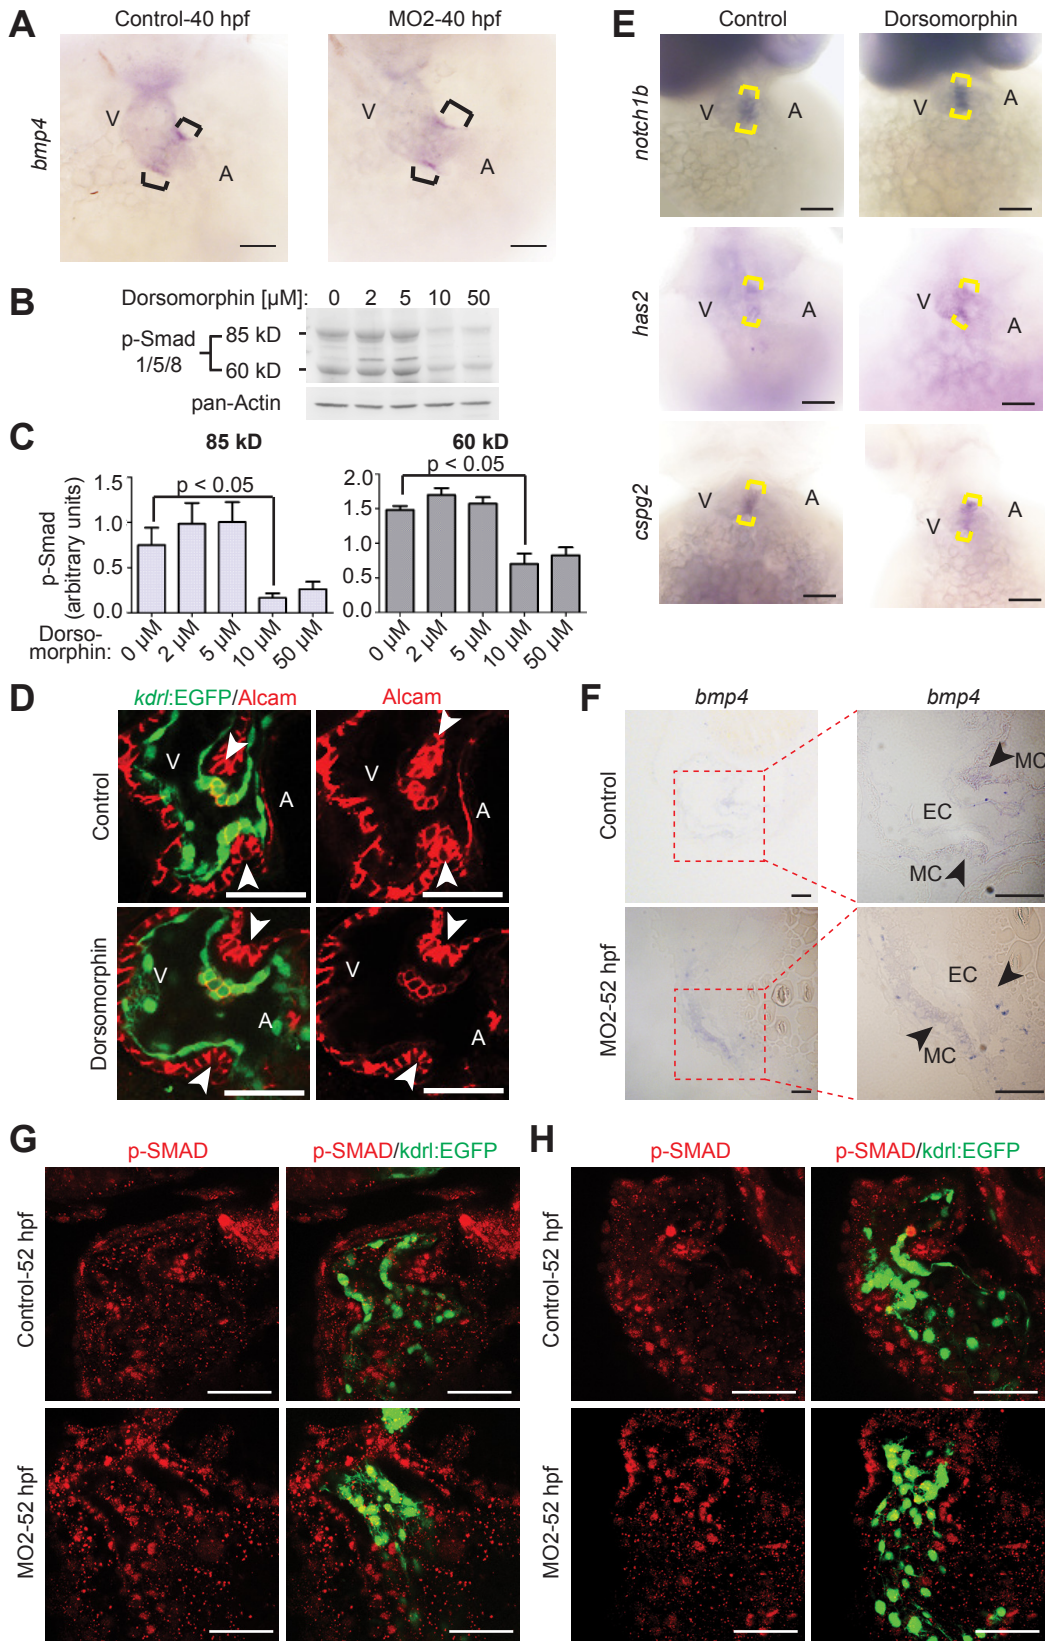

Supplement: supp_138.20.4499_DEV067454FigS7.pdf [file supp_138.20.4499_DEV067454FigS7.pdf]

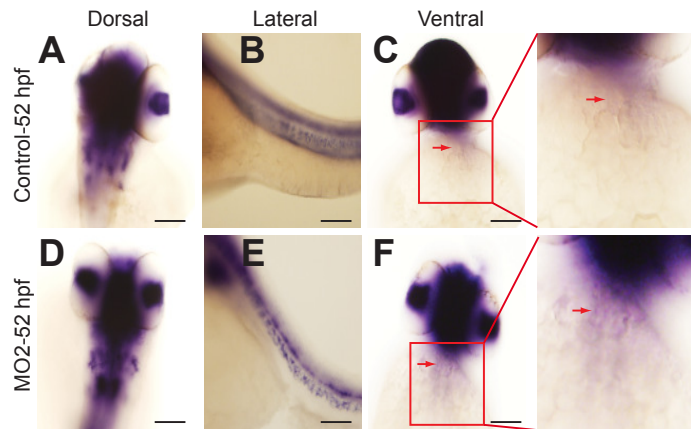

Supplement: supp_138.20.4499_DEV067454FigS8.pdf [file supp_138.20.4499_DEV067454FigS8.pdf]
